# Supplementary material
Source: PubMed Central journal article supplement (PMC5076516)

## SUPPLEMENTAL DATA

Kinetic and Structural Impact of Metal Ions and Genetic Variations on Human DNA Polymerase  $\epsilon$

**Jeong-Yun Choi<sup>1</sup>, Amritaj Patra<sup>2</sup>, Mina Yeom<sup>1</sup>, Young-Sam Lee<sup>3</sup>, Qianqian Zhang<sup>2</sup>, Martin Egli<sup>2</sup>,  
and F. Peter Guengerich<sup>2§</sup>**

From the <sup>1</sup>Division of Pharmacology, Department of Molecular Cell Biology, Samsung Biomedical Research Institute, Sungkyunkwan University School of Medicine, Gyeonggi-do 16419, Republic of Korea, the <sup>2</sup>Department of Biochemistry, Vanderbilt University School of Medicine, Nashville, Tennessee 37232-0146, and the <sup>3</sup>Department of New Biology, Daegu Gyeongbuk Institute of Science and Technology, Daegu 42988, Republic of Korea

*J. Biol. Chem.* **291**, 000-000 (2016)

## TABLE OF CONTENTS

**FIGURE S1. Pre-steady-state kinetics of dCTP incorporation opposite normal G by human pol  $\epsilon$  (26–445), pol  $\epsilon$  (1–445), and R96G pol  $\epsilon$  (1–445) enzymes in the presence of either Mn<sup>2+</sup> or Mg<sup>2+</sup>.**

**FIGURE S2. Structural comparison of pol  $\epsilon$  (26–445), pol  $\epsilon$  (1–445), and R96G pol  $\epsilon$  (1–445) ternary complexes with DNA and incoming nucleotide in the presence of Mg<sup>2+</sup> or Mn<sup>2+</sup>.**

FIGURE S1. Pre-steady-state kinetics of dCTP incorporation opposite normal G by human pol  $\iota$  (26–445), pol  $\iota$  (1–445), and R96G pol  $\iota$  (1–445) enzymes in the presence of either  $\text{Mn}^{2+}$  or  $\text{Mg}^{2+}$ . *A*, each of a 10-fold excess (1  $\mu\text{M}$ ) of pol  $\iota$  (1–445), pol  $\iota$  (26–445), and R96G pol  $\iota$  (1–445) enzymes was incubated with 100 nM 18-mer/36-mer primer/template DNA in the rapid quench-flow instrument and mixed with increasing dCTP concentrations at various time intervals in the presence of either 2 mM  $\text{MgCl}_2$  or 0.15 mM  $\text{MnCl}_2$  to perform the single turnover reactions, as described in the Experimental Procedures section. The results were fitted to a single-exponential equation to obtain the observed rates of nucleotide incorporation ( $k_{\text{obs}}$ ) for each dCTP concentrations. *B* and *C*, each plot of the  $k_{\text{obs}}$  values versus dCTP concentration for pol  $\iota$  (1–445,  $\blacksquare$ ), pol  $\iota$  (26–445,  $\blacktriangle$ ), and R96G pol  $\iota$  (1–445,  $\blacktriangledown$ ) enzymes was fit to a hyperbolic equation, and the estimated values of  $k_{\text{pol}}$  (the maximal rate of nucleotide incorporation) and  $K_{\text{d,dCTP}}$  (the equilibrium dissociation constant for dCTP) are listed in the Table 1. *B*, 2 mM  $\text{MgCl}_2$ ; *C*, 0.15 mM  $\text{MnCl}_2$ .

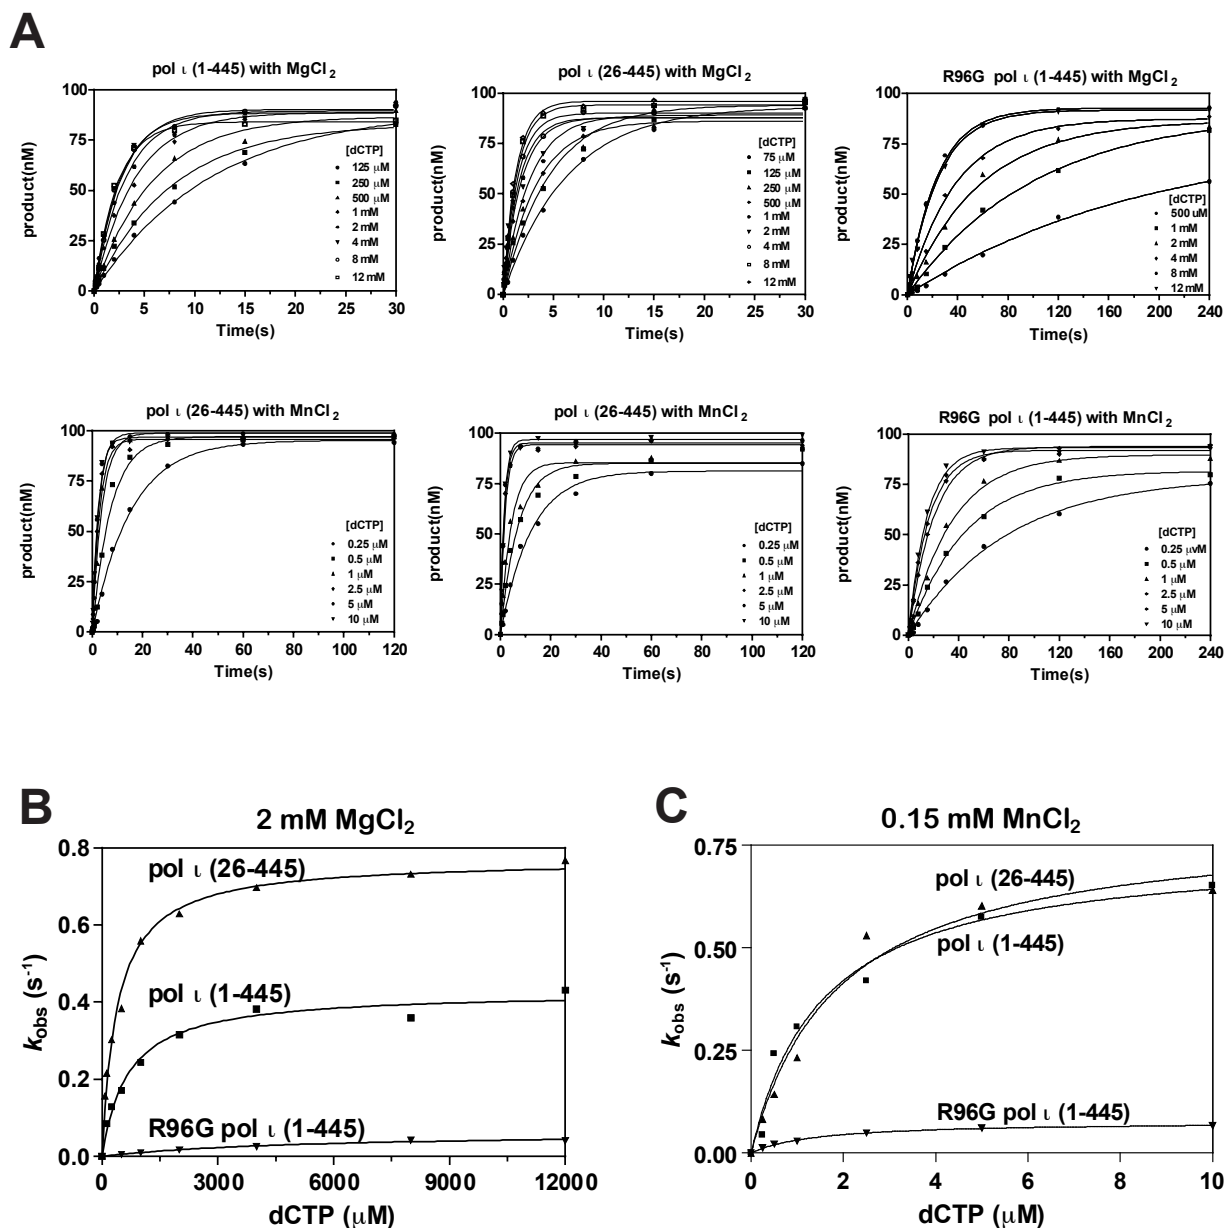

**FIGURE S2. Structural comparison of pol  $\iota$  (26–445), pol  $\iota$  (1–445), and R96G pol  $\iota$  (1–445) ternary complexes with DNA and incoming nucleotide in the presence of  $Mg^{2+}$  or  $Mn^{2+}$ .** *A*, superposition of the overall structures of pol  $\iota$  (26-445)-G-dCMPNPP- $Mg^{2+}$  (blue), pol  $\iota$  (1-445)-G-dCMPNPP- $Mg^{2+}$  (gray), and R96G pol  $\iota$  (1-445)-G-dCMPNPP- $Mg^{2+}$  (yellow) complexes. Pol  $\iota$  is shown as ribbons, DNA is shown as tube and ladder, the nucleotide is shown as sticks, and metal ions are shown as spheres. *B*, superposition of the overall structures of pol  $\iota$  (26-445)-G-dCMPNPP- $Mn^{2+}$  (red), pol  $\iota$  (1-445)-G-dCMPNPP- $Mn^{2+}$  (gray), and R96G pol  $\iota$  (1-445)-G-dCMPNPP- $Mn^{2+}$  (yellow) complexes. *C*, superposition of the active sites of pol  $\iota$  (26-445)-G-dCMPNPP- $Mg^{2+}$  (blue), pol  $\iota$  (1-445)-G-dCMPNPP- $Mg^{2+}$  (gray), and R96G pol  $\iota$  (1-445)-G-dCMPNPP- $Mg^{2+}$  (yellow) complexes. Active site residues, DNA, and nucleotide are shown as sticks, and metal ions are shown as spheres. *D*, superposition of active sites of pol  $\iota$  (26-445)-G-dCMPNPP- $Mn^{2+}$  (red), pol  $\iota$  (1-445)-G-dCMPNPP- $Mn^{2+}$  (gray), and R96G pol  $\iota$  (1-445)-G-dCMPNPP- $Mn^{2+}$  (yellow) complexes.

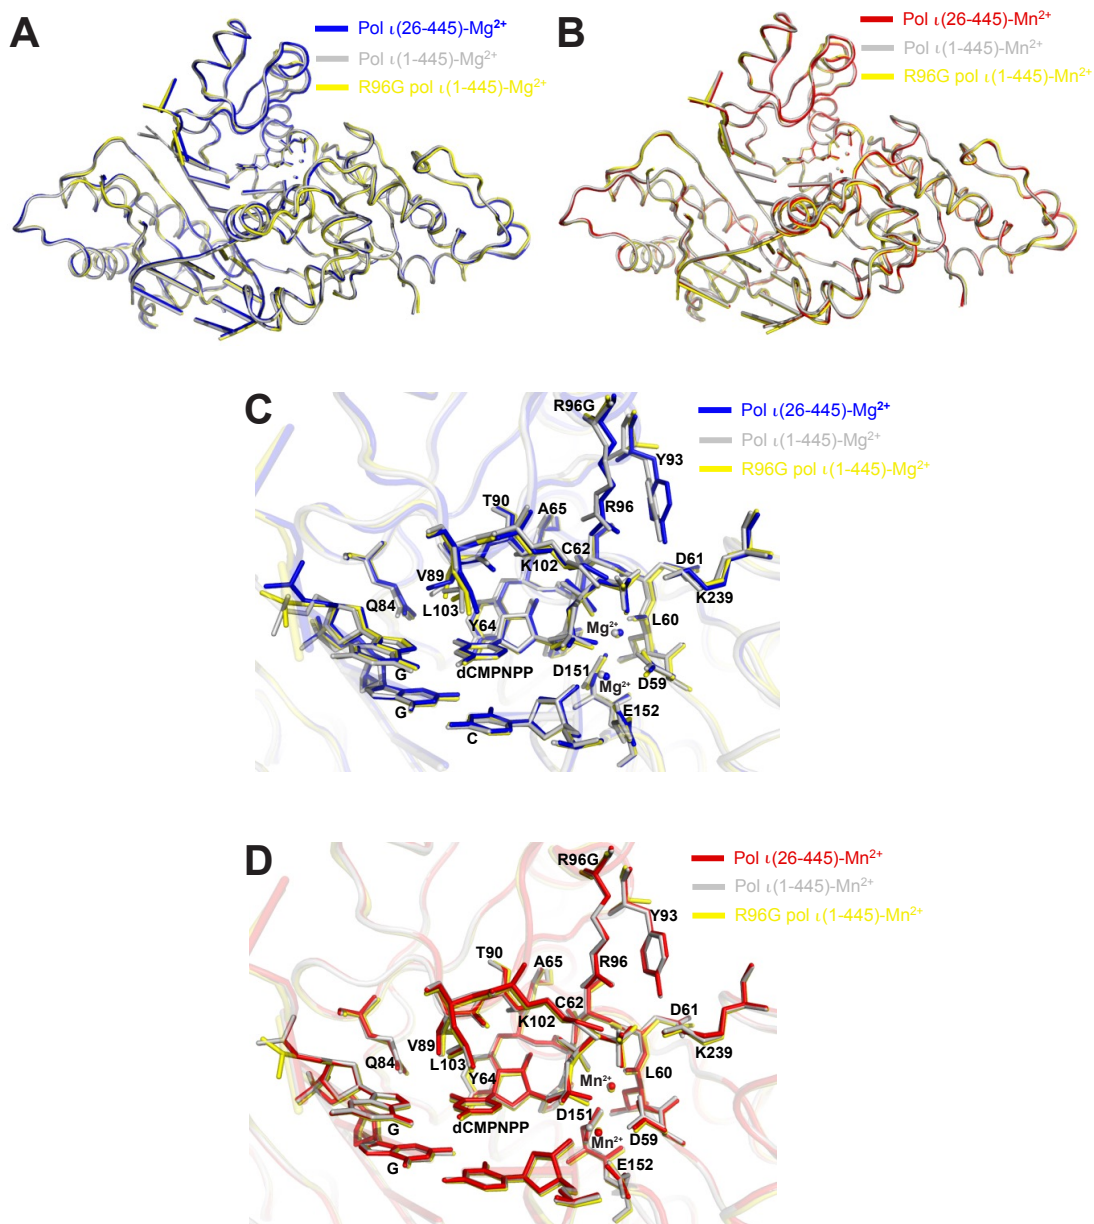

Supplement: 10.1074_M116.748285_jbc.M116.748285-1.pdf [file 10.1074_M116.748285_jbc.M116.748285-1.pdf]
